# Supplementary material for: A rod bacterium-like magnetic polymer micelle for strongly enhancing selective accumulation and internalization of nanocarriers
Source: Royal Society of Chemistry journal article supplement (doi:10.1039/c7tb00882a), 2017-01-01
Supplement: c7tb00882a1.pdf [file c7tb00882a1.pdf]

## Supporting Information

**Table S1.** Characterization of different shaped polymer micelles loaded with DOX.

| Sample              | Average size (nm) | PDI         | Zeta potential(mV) |
|---------------------|-------------------|-------------|--------------------|
| S <sub>1</sub>      | 109±2.1           | 0.126±0.010 | -19.8±0.2          |
| R <sub>1</sub>      | 224±3.2           | 0.395±0.019 | -20.2±0.1          |
| S <sub>2</sub>      | 136±3.8           | 0.131±0.023 | -23.4±0.2          |
| R <sub>2</sub>      | 341±5.7           | 0.412±0.021 | -24.1±0.3          |
| S <sub>1</sub> @DOX | 113±1.9           | 0.119±0.011 | -6.4±0.4           |
| R <sub>1</sub> @DOX | 231±2.7           | 0.412±0.02  | -7.2±0.3           |
| S <sub>2</sub> @DOX | 141±3.3           | 0.129±0.022 | -7.9±0.5           |
| R <sub>2</sub> @DOX | 348±6.3           | 0.432±0.025 | -9.1±0.3           |

**Table S2.** Characterization of the DOX-loaded different shaped polymer micelles.

| Sample      | S <sub>1</sub> @DOX | R <sub>1</sub> @DOX | S <sub>2</sub> @DOX | R <sub>2</sub> @DOX | R <sub>2</sub> @DOX/Fe <sub>3</sub> O <sub>4</sub> |
|-------------|---------------------|---------------------|---------------------|---------------------|----------------------------------------------------|
| LC%(UV-vis) | 4.9±0.29            | 7.0±0.42            | 5.1±0.96            | 7.3±0.33            | 4.3±0.21                                           |
| EE%(UV-vis) | 53.4±2.89           | 74.7±1.26           | 54.6±1.43           | 72.4±3.55           | 49.6±2.11                                          |

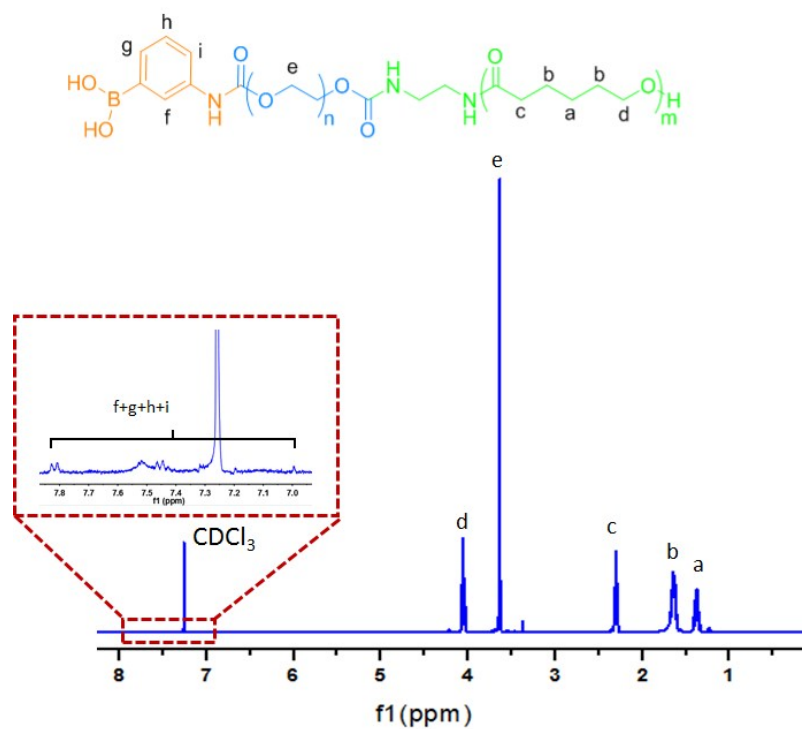

**Figure S1.**  $^1\text{H}$ NMR spectrum of the PBA-PEG-PCL copolymer in  $\text{CDCl}_3$ .

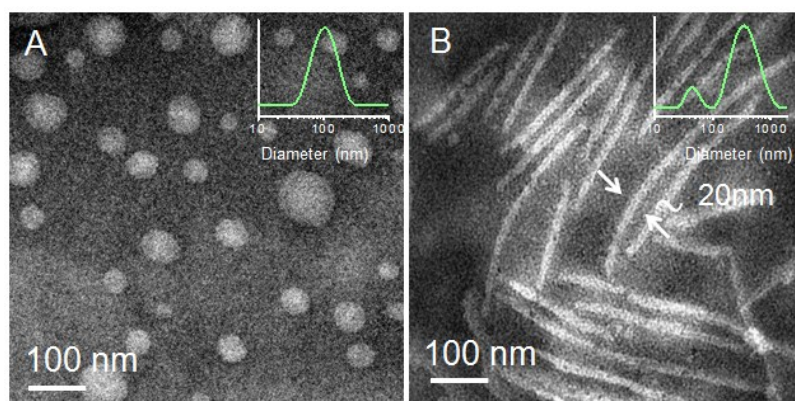

**Figure S2.** TEM images of micelles with different shapes. (A) mPEG-PCL blank micelles with spherical shape ( $S_1$ ); (B) mPEG-PCL blank micelles with rod-like shape ( $R_1$ ). The inserted images are the particle size distribution.

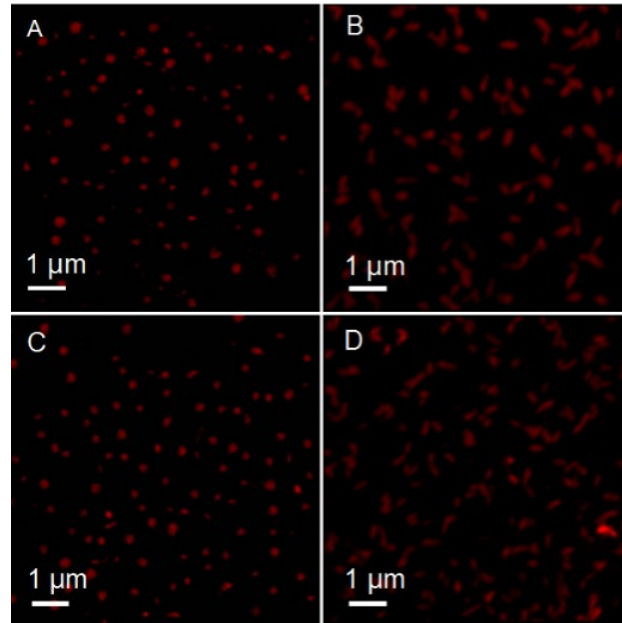

**Figure S3.** CLSM images of micelles with different drug-loaded morphologies. (A) mPEG-PCL micelles with spherical shape ( $S_1$ ); (B) mPEG-PCL micelles with rod-like shape ( $R_1$ ); (C) PBA-PEG-PCL micelles with spherical shape ( $S_2$ ); (D) PBA-PEG-PCL micelles with rod-like shape ( $R_2$ ).

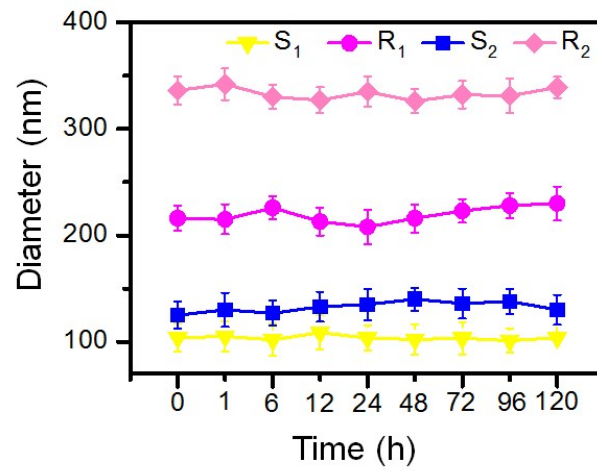

**Figure S4.** The stability of different shaped micelles at a concentration of 1 mg/mL in 0.9% physiological saline solution over time.  $S_1$ : mPEG-PCL micelles with spherical shape;  $R_1$ : mPEG-PCL micelles with rod-like shape;  $S_2$ : PBA-PEG-PCL micelles with spherical shape;  $R_2$ : PBA-PEG-PCL micelles with rod-like shape.

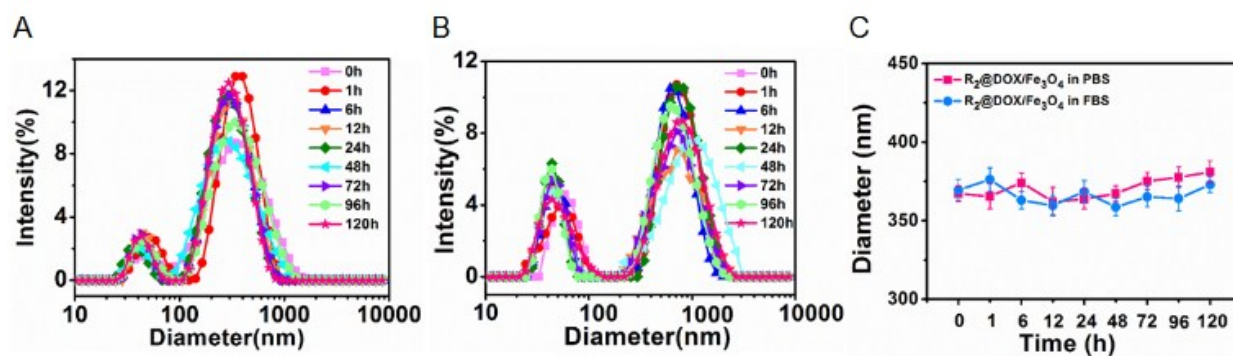

**Figure S5.** The stability of  $R_1@DOX/Fe_3O_4$  micelles at different dispersed media over time. A)  $R_1@DOX/Fe_3O_4$  micelles in PBS. B)  $R_1@DOX/Fe_3O_4$  micelles in FBS. C) The average size changes of the micelles over time.

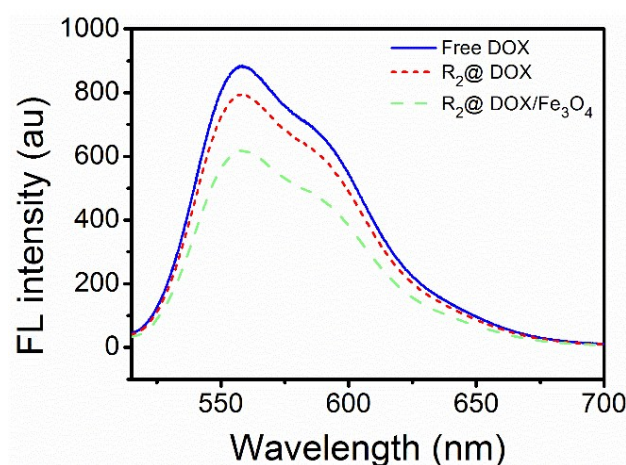

**Figure S6.** Fluorescence emission spectra of Free DOX,  $R_2@DOX$ ,  $R_2@DOX/Fe_3O_4$  (DOX dose is 5  $\mu\text{g/mL}$  in all the three groups).

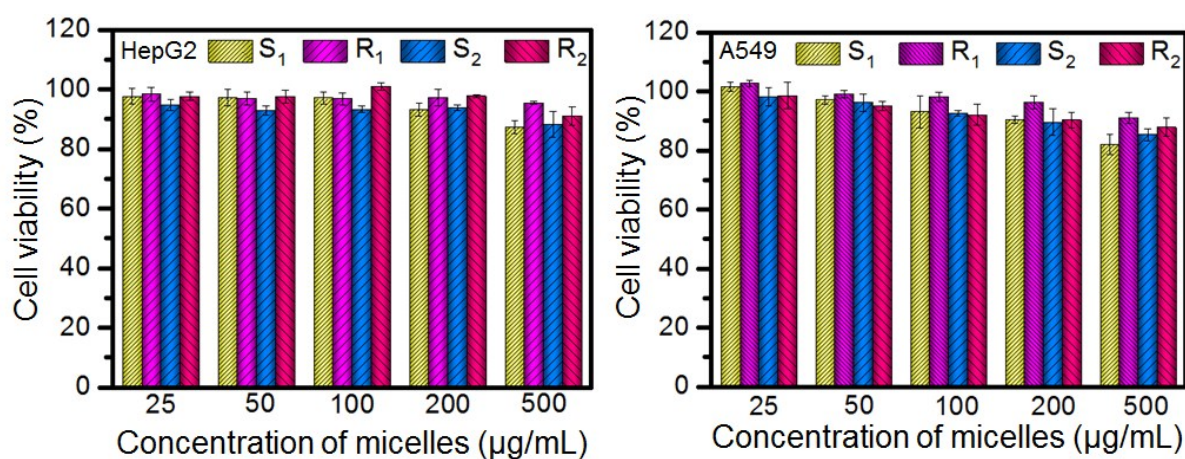

**Figure S7.** Cell viability of HepG2 cells and A549 cells after incubation with  $S_1$ ,  $R_1$ ,  $S_2$  and  $R_2$  at different concentrations for 24 h.



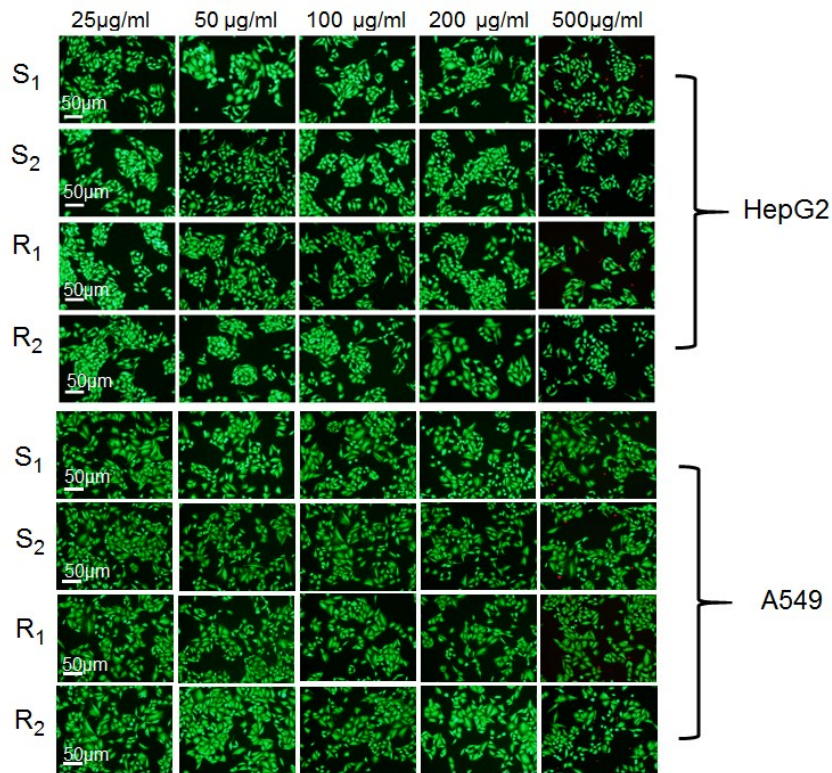

**Figure S8.** Fluorescence images of HepG2 cells and A549 cells after incubation with S<sub>1</sub>, R<sub>1</sub>, S<sub>2</sub> and R<sub>2</sub> at different concentrations for 24 h.

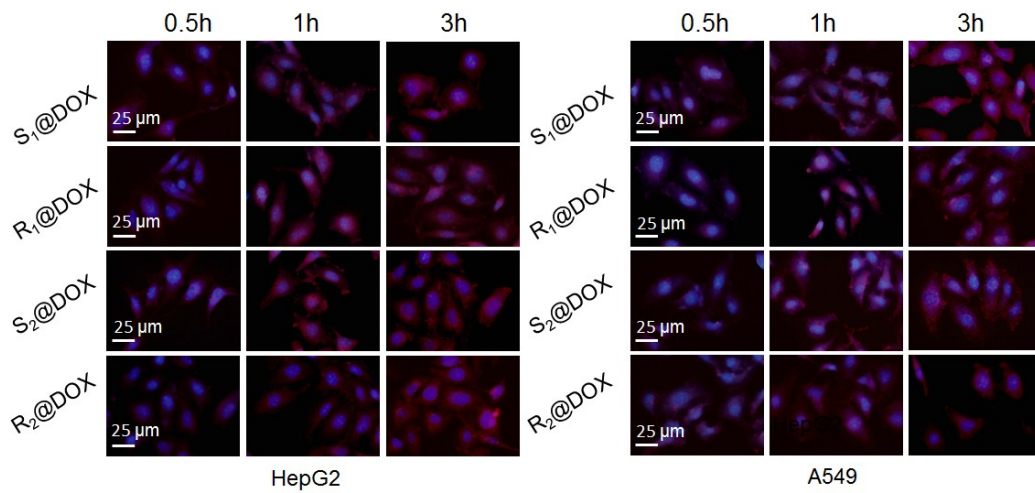

**Figure S9.** Fluorescence images of cellular uptake of different shaped DOX-loaded micelles after incubation with HepG2 cells and A549 cells for 0.5 h, 1 h and 3 h.

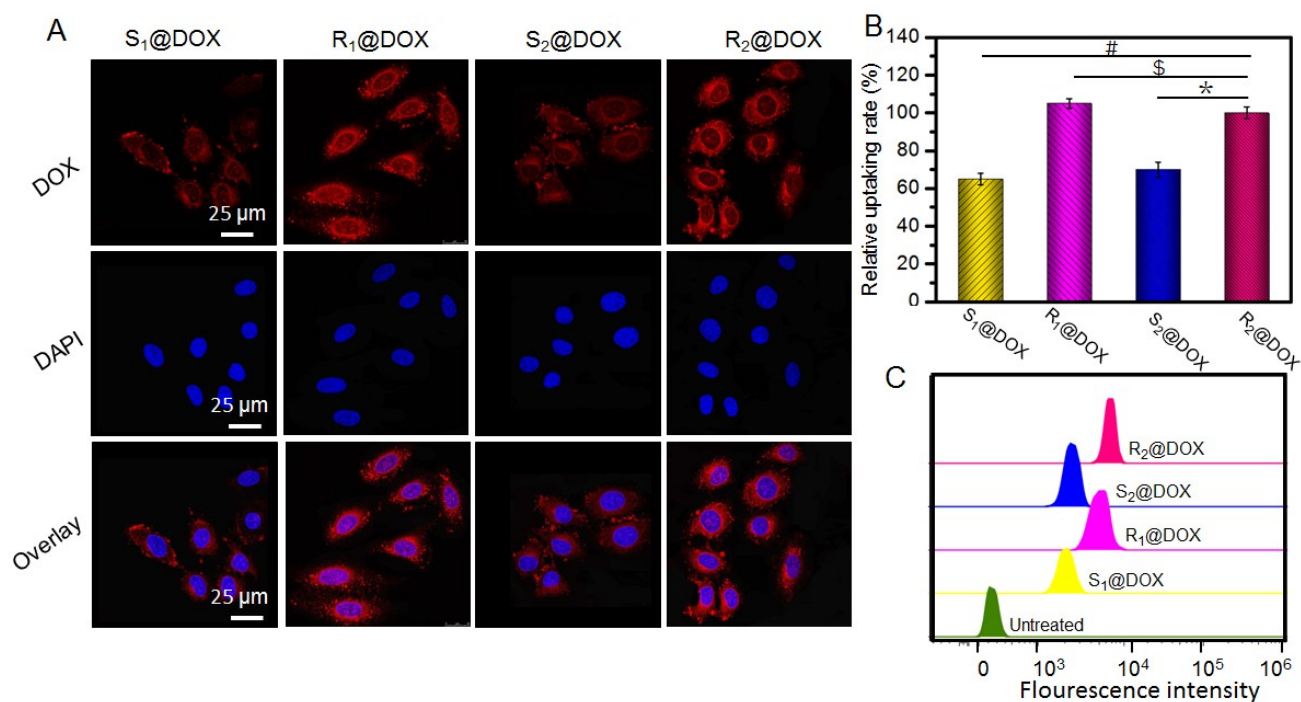

**Figure S10.** Cellular uptake and intracellular distribution of the DOX-loaded micelles in A549 cells. (A) CLSM image of A549 cells after incubated with S<sub>1</sub>@DOX, R<sub>1</sub>@DOX, S<sub>2</sub>@DOX, R<sub>2</sub>@DOX for 3 h. The nuclei were stained with DAPI (blue) and the dose of DOX is 5  $\mu$ g/mL. (B) Quantitative analysis of DOX in A549 cells through the Image-Pro Plus 6.0. The S<sub>1</sub>@DOX, R<sub>1</sub>@DOX and S<sub>2</sub>@DOX groups were compared with the R<sub>2</sub>@DOX group. The data were shown as the mean  $\pm$  standard (SD) (n = 3). \$ (not significant), \* (P<0.05), # (P<0.01). (C) Flow cytometry quantitative analysis of HepG2 cells after incubation with free DOX, S<sub>1</sub>@DOX, R<sub>1</sub>@DOX, S<sub>2</sub>@DOX and R<sub>2</sub>@DOX for 3 h (DOX dose: 5  $\mu$ g/mL).
